# Supplementary material for: Electrospun Chitosan Functionalized with C12, C14 or C16 Tails for Blood-Contacting Medical Devices
Source: MDPI journal article supplement (doi:10.3390/gels8020113), 2022-02-12
Supplement: s1 [file s1]

Supplementary Materials

Article

# Electrospun Chitosan Functionalized with C12, C14 or C16 Tails for Blood-Contacting Medical Devices

Monica Dettin <sup>1</sup>, Martina Roso <sup>1</sup>, Grazia M. L. Messina <sup>2</sup>, Giovanna Iucci <sup>3</sup>, Valentina Peluso <sup>4</sup>, Teresa Russo <sup>4</sup>, Annj Zamuner <sup>1,\*</sup>, Marta Santi <sup>3</sup>, Sabrina Milan Manani <sup>5</sup>, Monica Zanella <sup>5</sup>, Chiara Battocchio <sup>3</sup>, Giovanni Marletta <sup>2</sup>, Michele Modesti <sup>1</sup>, Mario Rasso <sup>5</sup>, Massimo De Cal <sup>5</sup>, Claudio Ronco <sup>5,6</sup>

Table S1. Mean diameter of fibers and mean mesh dimension  $\pm$  SD.

| Electrospun scaffold | Mean diameter (nm) | Mean mesh dimension (nm) |
|----------------------|--------------------|--------------------------|
| ChitPEO (90:10)      | 130.5 $\pm$ 33.3   | 808.7 $\pm$ 311.2        |
| ChitC12PEO (90:10)   | 127.9 $\pm$ 27.8   | 768.7 $\pm$ 380.9        |
| ChitC14PEO (70:30)   | 172.5 $\pm$ 65.2   | 643.5 $\pm$ 226.5        |
| ChitC16PEO (70:30)   | 331.8 $\pm$ 71.5   | 1156.0 $\pm$ 820.4       |

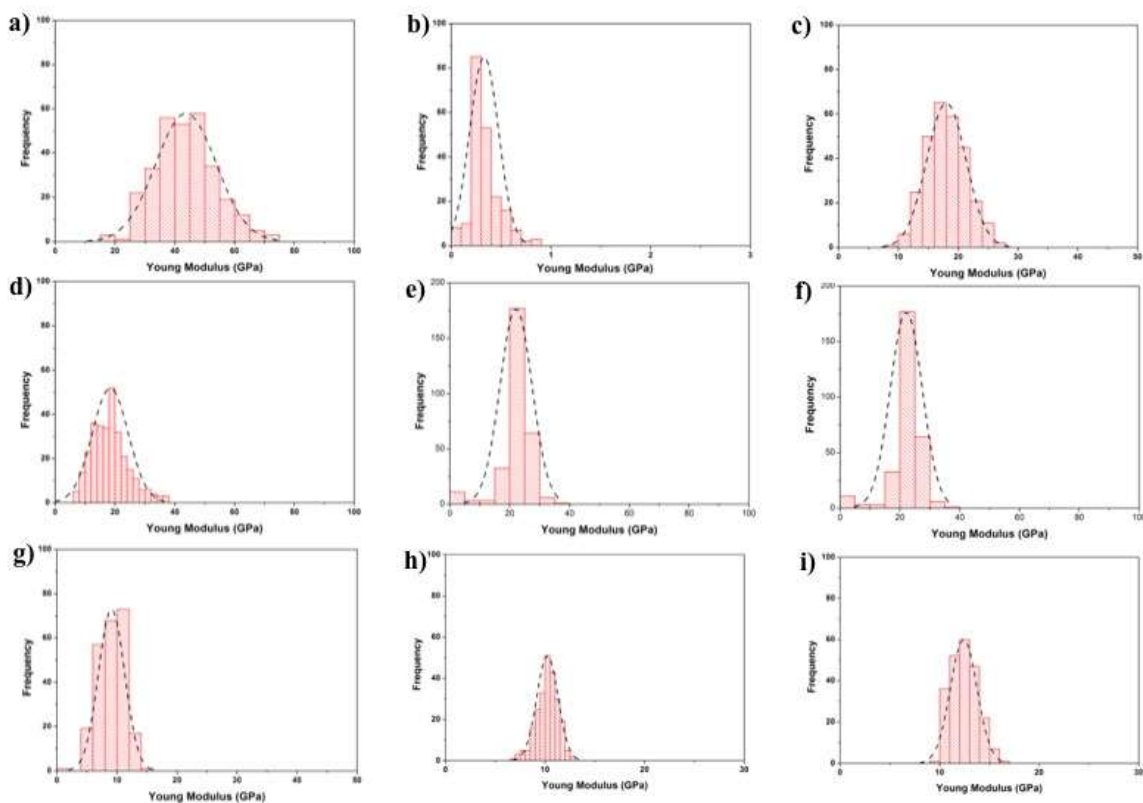

**Figure S1.** Frequency distribution of Young's modulus of a) Chitosan, b) PEO, c) ChitPEO, d) ChitC12, e) ChitC14, f) ChitC16, g) ChitC12PEO, h) ChitC14PEO and i) ChitC16PEO.

**Table S2.** Measured BEs and assignment of the XPS component peaks.

| Spectrum | Components     | BE (eV)   | Assignment   |
|----------|----------------|-----------|--------------|
| C1s      | C <sub>1</sub> | 285.0±0.1 | C-C          |
|          | C <sub>2</sub> | 286.7±0.1 | C-O, C-N     |
|          | C <sub>3</sub> | 288.5±0.1 | O-C-O, N-C=O |
| N1s      | N <sub>1</sub> | 399.8±0.1 | unprotonated |
| O1s      |                | 532.8±0.1 | O-C          |

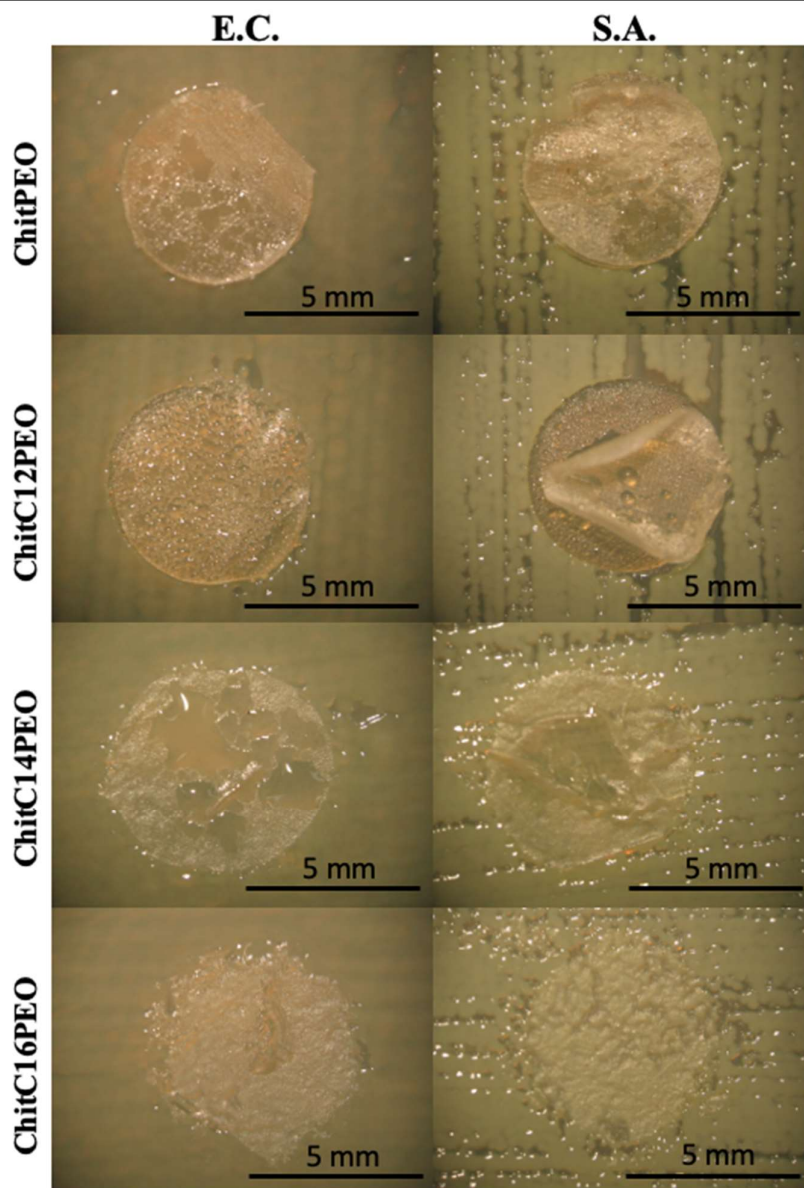

**Figure S2.** Bacteriostatic/bactericidal properties of the scaffolds. After removal of a circular portion of the every four different electrospun scaffolds (ChitPEO, ChitC12PEO, ChitC14PEO and ChitC16PEO), *E.coli* and *S. aureus* were plated in Mueller-Hinton agar and incubated with the four electrospun patches for 24 h at 37°. No growth in contact with all the electrospun scaffolds.

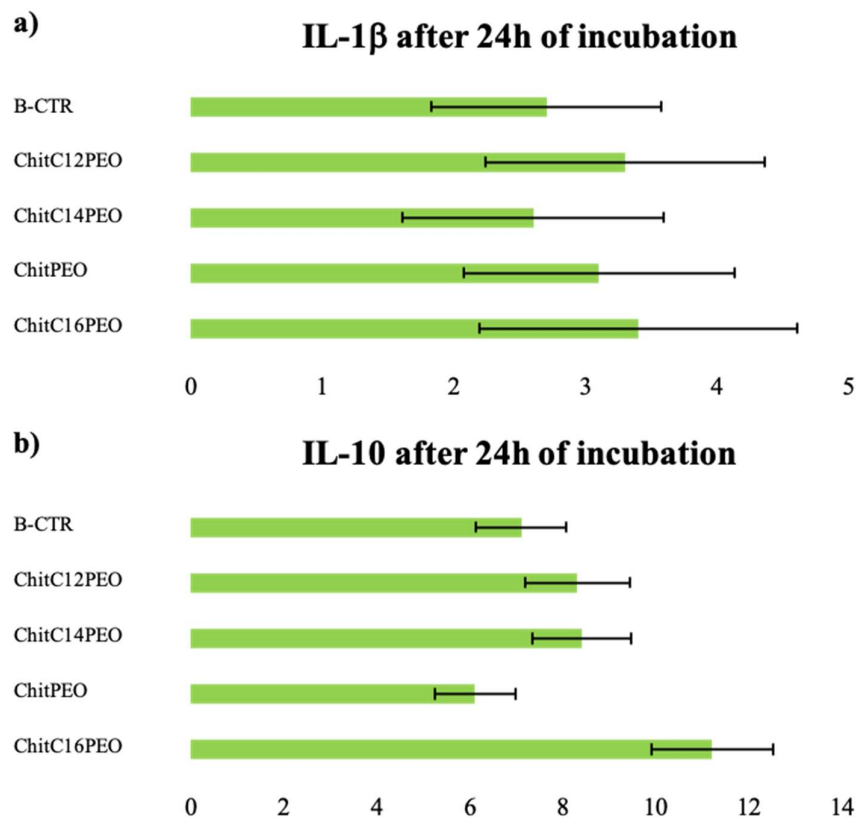

**Figure S3.** IL-1b levels (a) and IL-10 levels (b) after 24h of healthy volunteer blood incubation with 4 test devices and without (B-CTR). Results are expressed in pg/mL.

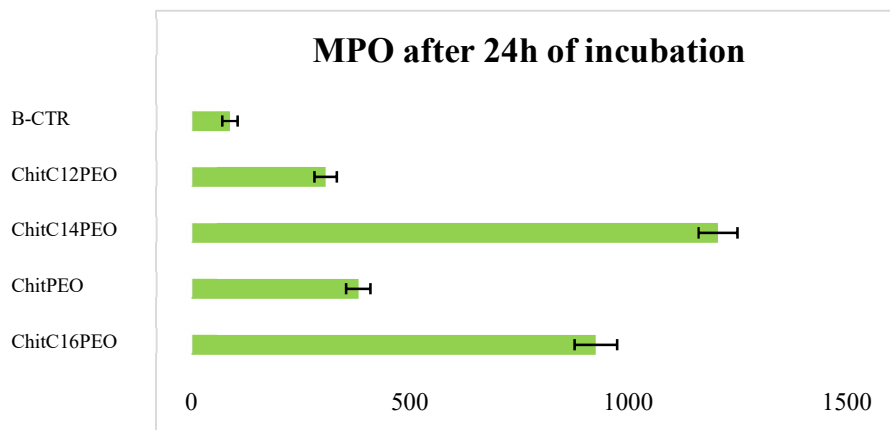

**Figure S4.** MPO levels after 24h of healthy volunteer blood incubation with 4 test devices and without (B-CTR). Results are expressed in pg/mL.

**Table S3.** Electrospinning conditions used to obtain scaffolds of nanofibers.

|                   | Needle<br>(G) | Total volume<br>(ml)    | Flow rate<br>(ml/h) | Voltage<br>(kV) | Tip to<br>collector<br>distance<br>(cm) | Temperature (°C) | Relative<br>Humidity<br>(%) |
|-------------------|---------------|-------------------------|---------------------|-----------------|-----------------------------------------|------------------|-----------------------------|
| <b>ChitPEO</b>    | 22            | 10                      | 0.8                 | 12              | 10                                      | 18.5             | 8-10                        |
| <b>ChitC12PEO</b> | 22            | 10                      | 0.8                 | 23              | 10                                      | 18               | 8-12                        |
| <b>ChitC14PEO</b> | 22            | 3 PEO<br>+ 6 ChitC14PEO | 0.2                 | 22              | 30                                      | 17-18            | 4-10                        |
| <b>ChitC16PEO</b> | 22            | 3 PEO<br>+ 6 ChitC16PEO | 0.9                 | 23              | 10                                      | 18-19            | 4-8                         |
